# Supplementary material
Source: PubMed Central journal article supplement (PMC2711648)
Supplement: 00096.2009_1.pdf [file 00096.2009_1.pdf]

**Supplementary Table 1.** Forward primer sequences for the open reading frame of PCFT used for site-directed mutagenesis.

|              | <b>Primer sequence (5' to 3')</b> |
|--------------|-----------------------------------|
| <i>D156L</i> | tgtagccctcctcggcctctcggtagccctctg |
| <i>E232L</i> | gctttctgctttggctcgacctaaaggagcca  |
| <i>E336L</i> | gatgcctgggtagctctgatcggcctggccttc |
| <i>R148L</i> | tacttcgtgctgggtctcatcctttgtgcctc  |
| <i>R376L</i> | atcacacctgcatcctggctaaactctccaag  |
| <i>R378L</i> | cctgtcatccgggcttactctccaagctggg   |
| <i>K381A</i> | cgggctaaactctccgcgctggtagagagaca  |
| <i>R180A</i> | cgcagccgcacctcgcgatggccctgtagaa   |
| <i>D156A</i> | tgtagccctcctcggcgcctcggtagccctt   |
| <i>R148A</i> | tacttcgtgctgggtgccatcctttgtgcctc  |
| <i>E232A</i> | gctttctgctttggctcgacctaaaggagcca  |
| <i>R376A</i> | atcacacctgcatcgggctaaactctccaag   |
| <i>E185L</i> | cggatggccctgctactagccagcatcggggg  |
| <i>E185A</i> | cggatggccctgctagcagccagcatcggggg  |
| <i>E185C</i> | cggatggccctgctatgtgccagcatcggggg  |
| <i>E185D</i> | cggatggccctgctagacccagcatcggggg   |
| <i>E185H</i> | cggatggccctgctacagccagcatcggggg   |
| <i>E185Q</i> | cggatggccctgctacaagccagcatcggggg  |

**Supplementary Table 2.** The multi-alignment and conservation status of human PCFT TMD charged amino acid residues among species.

| H. sapiens    | D156<br>(TMD-IV) | E185<br>(TMD-V) | E232<br>(TMD-VI) | E336<br>(TMD-IX) | R148<br>(TMD-IV) | R180<br>(TMD-V-<br>Border) | R376<br>(TMD-X) | K378<br>(TMD-X) | K381<br>(TMDX-<br>Border) |
|---------------|------------------|-----------------|------------------|------------------|------------------|----------------------------|-----------------|-----------------|---------------------------|
| M. mulatta    | D                | E               | E                | E                | R                | R                          | R               | K               | K                         |
| M. musculus   | D                | E               | E                | E                | R                | R                          | R               | K               | K                         |
| R. norvegicus | D                | E               | E                | E                | R                | R                          | R               | K               | K                         |
| C. familiaris | D                | E               | E                | E                | R                | R                          | R               | K               | K                         |
| B. taurus     | D                | E               | E                | E                | R                | R                          | R               | K               | R                         |
| M. domestica  | D                | E               | E                | E                | R                | R                          | R               | K               | R                         |
| D. rerio      | D                | E               | E                | E                | R                | R                          | R               | K               | K                         |
| G. gallus     | D                | E               | E                | E                | R                | R                          | R               | K               | K                         |
